# Supplementary material for: Preparation of RHgCl via transmetalation of (8-quinolyl)SnMe3and redistribution to R2Hg (R = 8-quinolyl): a highly distorted diorganomercury(ii) with 84 degree C–Hg–C angle
Source: Royal Society of Chemistry journal article supplement (doi:10.1039/c4dt00384e), 2014-01-01
Supplement: c4dt00384e1.pdf [file c4dt00384e1.pdf]

## Supporting information

### Preparation of $\text{RHgCl}$ and $\text{R}_2\text{Hg}$ ( $\text{R} = 8\text{-quinolyl}$ ) via Transmetallation of (8-quinolyl) $\text{SnMe}_3$

Sem Raj Tamang, Jung-Ho Son, James D. Hoefelmeyer

*Department of Chemistry, University of South Dakota, 414 E. Clark St., Vermillion, SD 57069*

[jhoefelm@usd.edu](mailto:jhoefelm@usd.edu)

## Contents

|                                                                                               |   |
|-----------------------------------------------------------------------------------------------|---|
| Figure S1 $^1\text{H}$ of 8-trimethyltinquinoline (1). .....                                  | 2 |
| Figure S2 $^{13}\text{C}$ of 8-trimethyltinquinoline (1). .....                               | 2 |
| Figure S3 $^1\text{H}$ of chloro-8-quinolylmercury(II) (2). .....                             | 3 |
| Figure S4 $^{13}\text{C}$ of chloro-8-quinolylmercury(II) (2). .....                          | 3 |
| Figure S5 $^{199}\text{Hg}$ of chloro-8-quinolylmercury(II) (2). \.....                       | 4 |
| Figure S6 $^1\text{H}$ of bis (8-quinolyl)mercury (II) (bent (3) and linear (4)). .....       | 4 |
| Figure S7 $^{13}\text{C}$ of bis(8-quinolyl)mercury (II) (bent (3) and linear (4)). .....     | 5 |
| Figure S8 $^{199}\text{Hg}$ of bis(quinolyl)mercury (II) (bent (3) and linear (4)). .....     | 5 |
| Figure S9 $^1\text{H}$ of bis(8-quinolyl)mercury (II)[ $\text{SCN}$ ] $^-_2$ (5). .....       | 6 |
| Figure S10 $^{13}\text{C}$ of bis(8-quinolyl)mercury (II)[ $\text{SCN}$ ] $^-_2$ (5). .....   | 6 |
| Figure S11 $^{199}\text{Hg}$ of bis(8-quinolyl)mercury (II)[ $\text{SCN}$ ] $^-_2$ (5). ..... | 7 |
| Figure S12 Dihedral angel between the two quinolyl planes in (3). .....                       | 8 |
| Figure S13 Intermolecular $\pi$ - $\pi$ interaction between the planes in (5). .....          | 8 |
| Table 1 Crystallographic data for 2-5. ....                                                   | 9 |

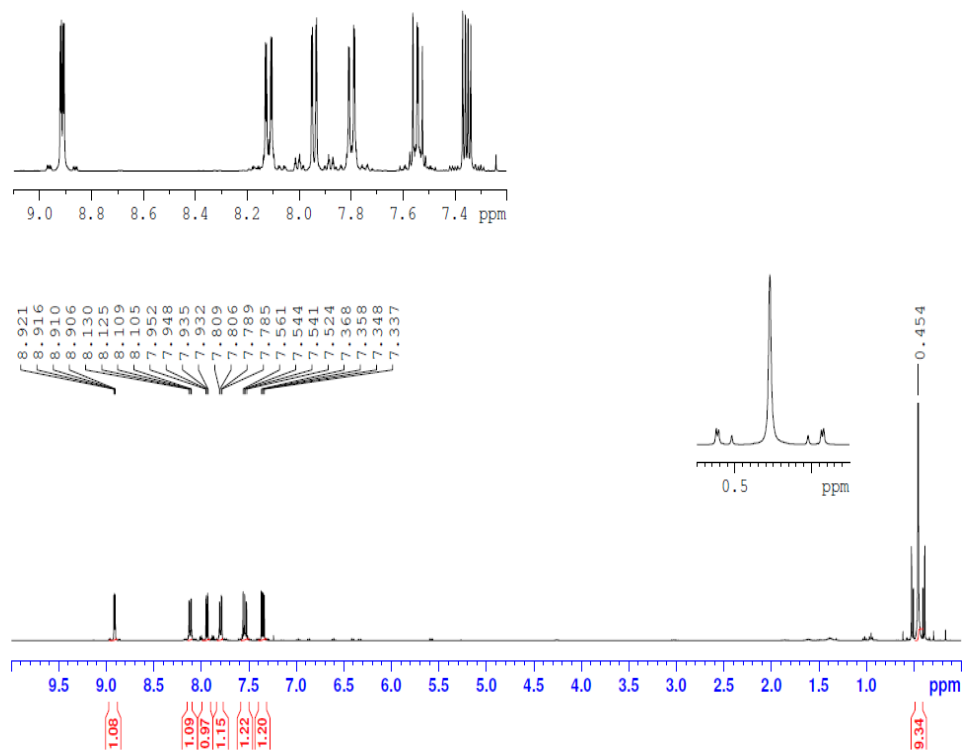

**Figure S1** <sup>1</sup>H of 8-trimethyltinquinoline (1).

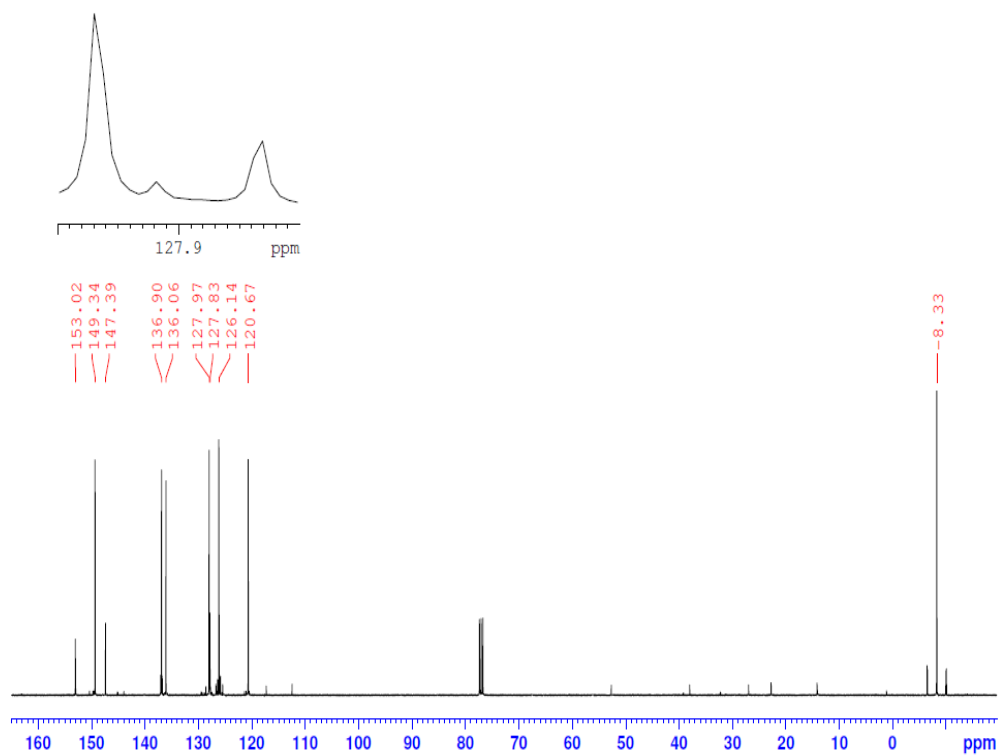

**Figure S2** <sup>13</sup>C of 8-trimethyltinquinoline (1).



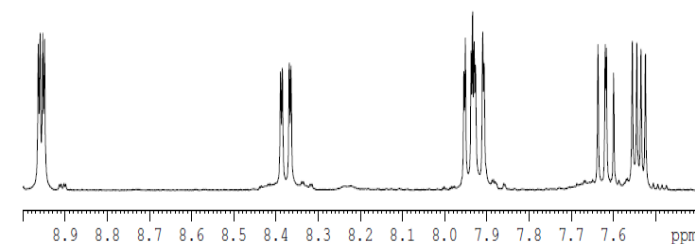

8.960  
8.953  
8.949  
8.935  
8.925  
8.909  
8.904  
8.894  
8.871  
8.867  
8.851  
8.827  
8.820  
8.810  
8.806  
8.806  
8.819  
8.816  
8.809  
8.805  
8.804  
8.804  
8.804

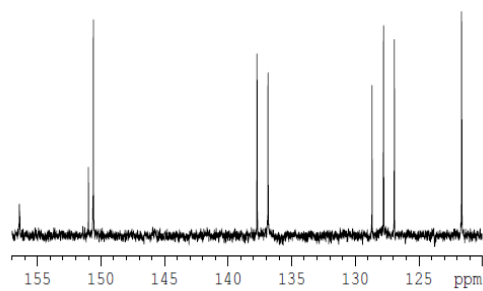

**Figure S3**  $^1\text{H}$  of chloro-8-quinolylmercury(II) (**2**).

156  
156  
150  
137  
137  
133  
133  
133  
133  
128  
128  
125  
125

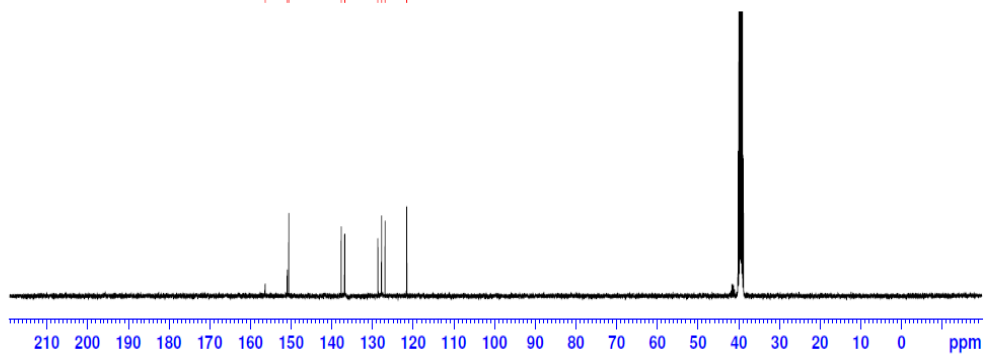

**Figure S4**  $^{13}\text{C}$  of chloro-8-quinolylmercury(II) (**2**).



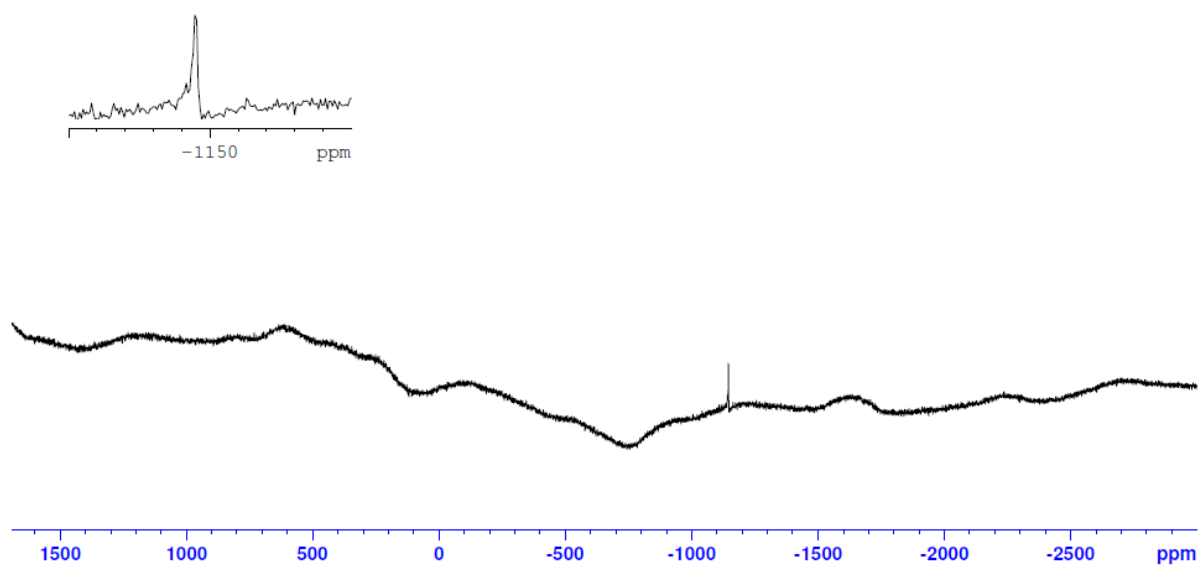

**Figure S5**  $^{199}\text{Hg}$  of chloro-8-quinolylmercury(II) (2).

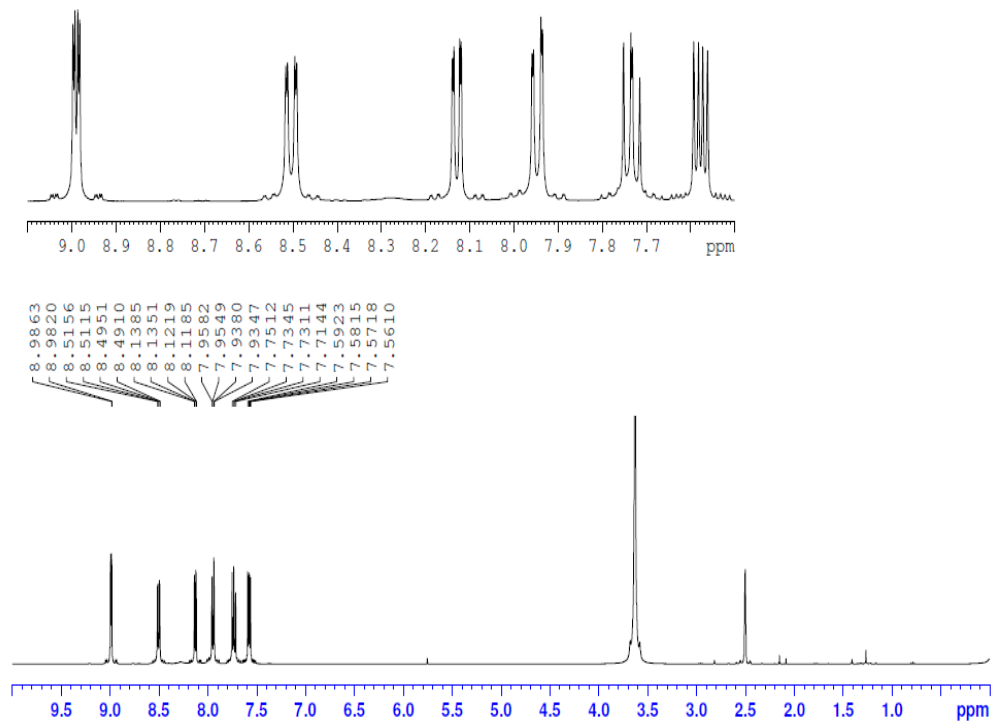

**Figure S6**  $^1\text{H}$  of bis(8-quinolyl)mercury (II) (bent (3) and linear (4)).

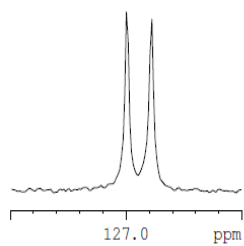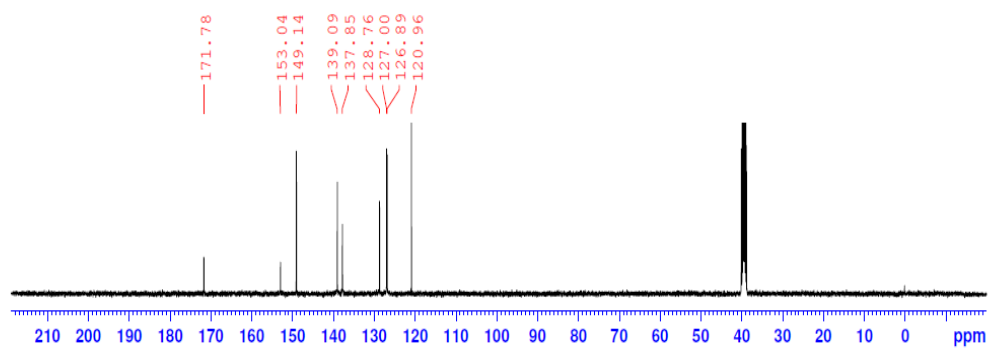

**Figure S7**  $^{13}\text{C}$  of bis(8-quinolyl)mercury (II) (bent (**3**) and linear (**4**)).

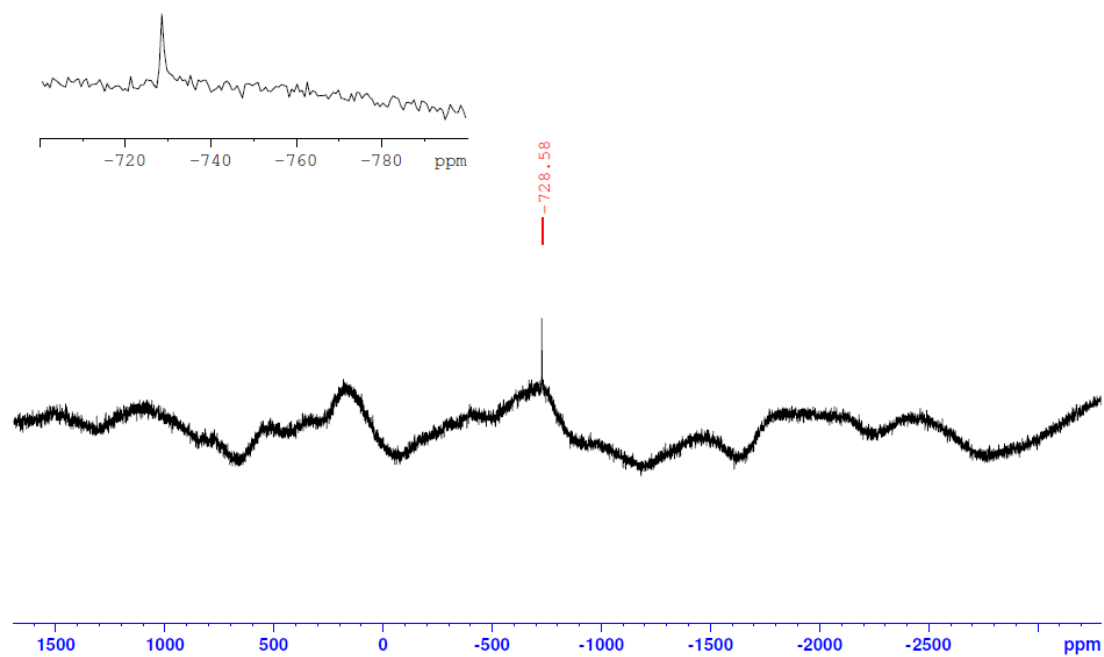

**Figure S8**  $^{199}\text{Hg}$  of bis(quinolyl)mercury (II) (bent (**3**) and linear (**4**)).



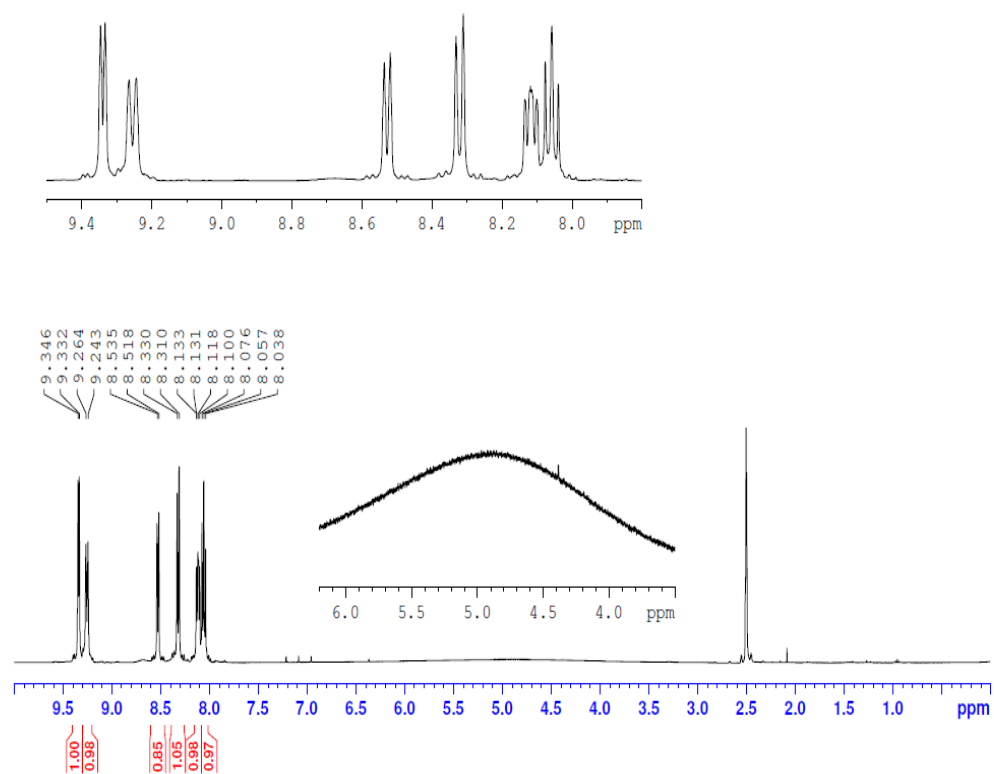

**Figure S9** <sup>1</sup>H of bis(8-quinolyl)mercury (II)[SCN]<sub>2</sub> (5).

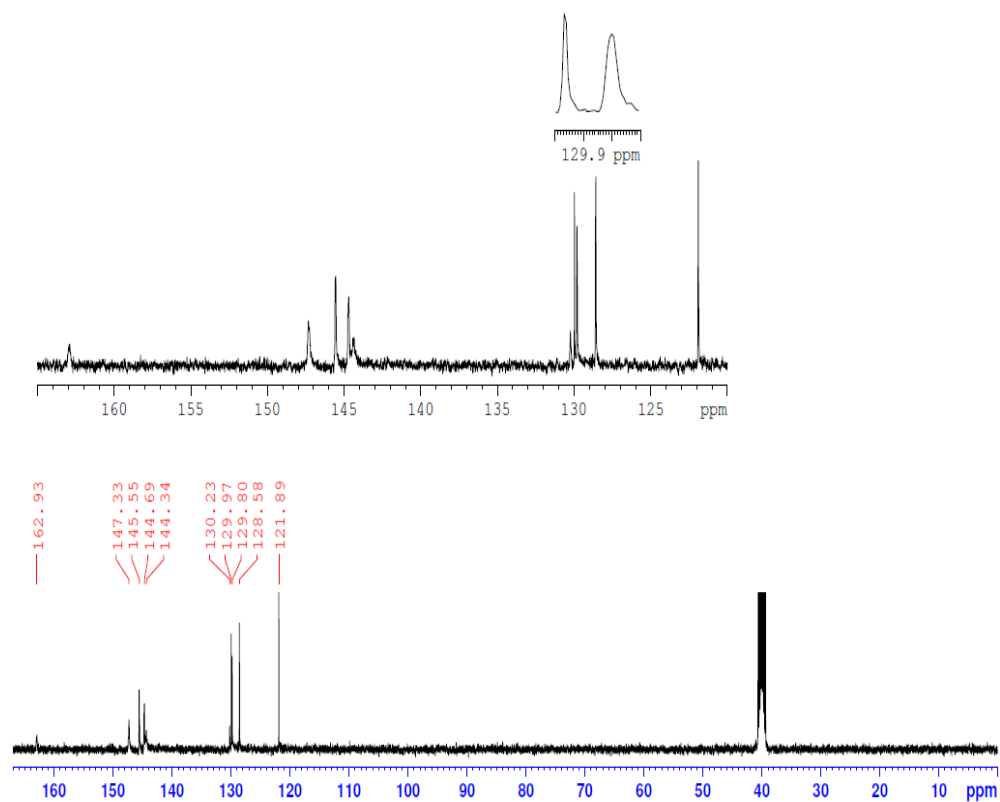

**Figure S10** <sup>13</sup>C of bis(8-quinolyl)mercury (II)[SCN]<sub>2</sub> (5).

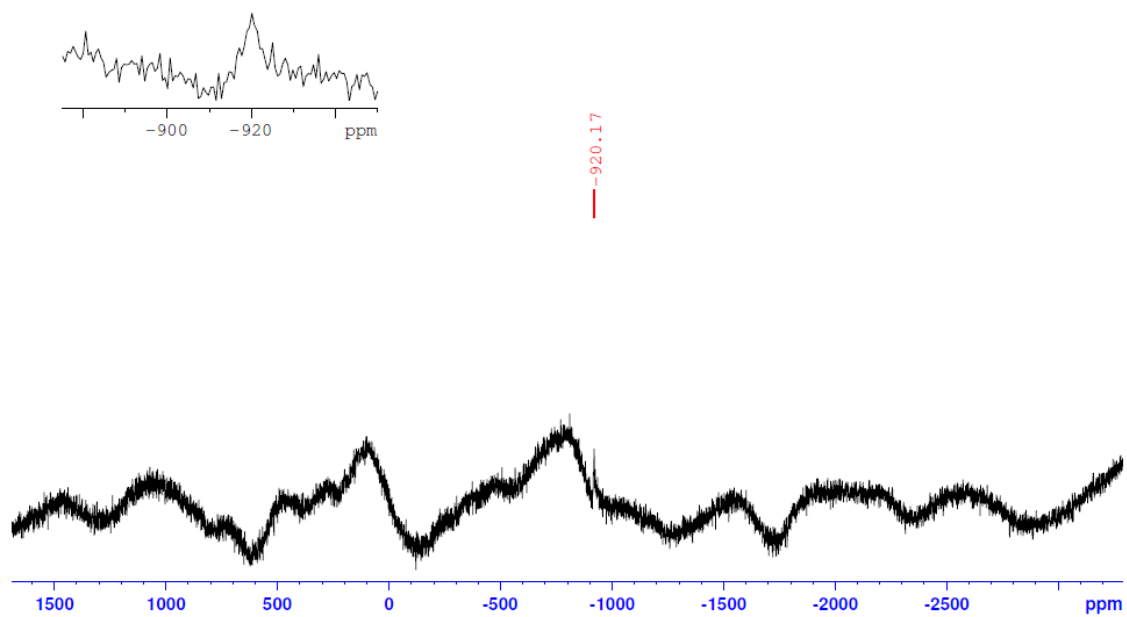

**Figure S11**  $^{199}\text{Hg}$  of bis(8-quinolyl)mercury (II)[SCN] $_2$  (**5**).

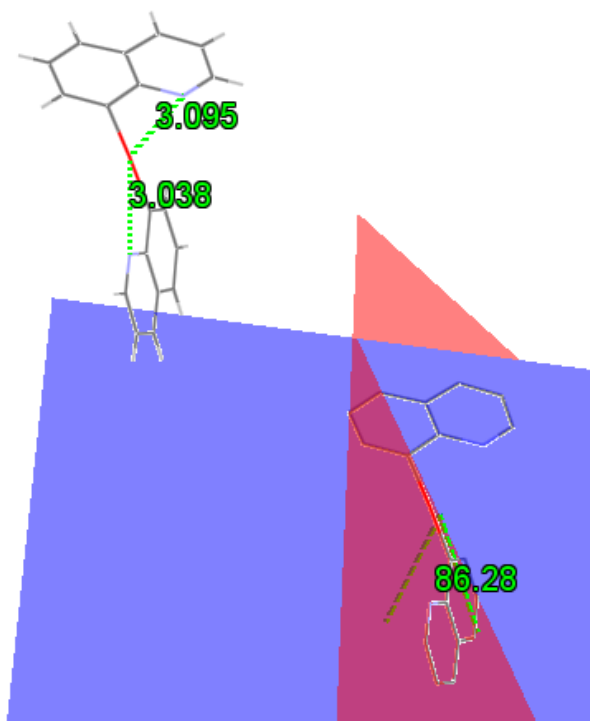

**Figure S12** Dihedral angel between the two quinolyl planes in (**3**).

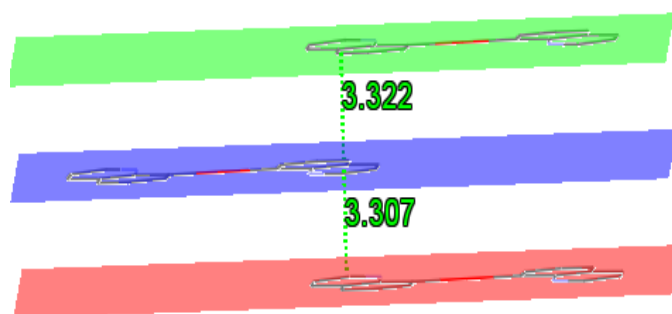

**Figure S13** Intermolecular  $\pi$ - $\pi$  interaction between the planes in (**5**).

**Table 1** Crystallographic data for 2-5.

|                           | 2                                   | 3                                                 | 4                                                 | 5                                                                      |
|---------------------------|-------------------------------------|---------------------------------------------------|---------------------------------------------------|------------------------------------------------------------------------|
| Formula                   | C <sub>9</sub> H <sub>6</sub> NHgCl | C <sub>18</sub> H <sub>12</sub> N <sub>2</sub> Hg | C <sub>18</sub> H <sub>12</sub> N <sub>2</sub> Hg | [C <sub>18</sub> H <sub>14</sub> N <sub>2</sub> Hg]·[SCN] <sub>2</sub> |
| Formula Wt.               | 364.19                              | 456.89                                            | 456.89                                            | 575.06                                                                 |
| Cryst. Syst.              | Monoclinic                          | Monoclinic                                        | Monoclinic                                        | Triclinic                                                              |
| space group               | P 21/c                              | P 21/c                                            | C2                                                | P-1                                                                    |
| <i>a</i> (Å)              | 10.133(5)                           | 4.7776(3)                                         | 14.1731(17)                                       | 6.860(3)                                                               |
| <i>b</i> (Å)              | 4.048(5)                            | 11.4357(9)                                        | 6.2064(8)                                         | 8.202(4)                                                               |
| <i>c</i> (Å)              | 21.799(5)                           | 25.3031(2)                                        | 10.469(19)                                        | 9.116(4)                                                               |
| $\alpha$                  | 90                                  | 90                                                | 90                                                | 107.127(5)                                                             |
| $\beta$                   | 91.253(5)                           | 90.326                                            | 131                                               | 110.701(5)                                                             |
| $\gamma$                  | 90                                  | 90                                                | 90                                                | 94.266(5)                                                              |
| V (Å <sup>3</sup> )       | 893.9(12)                           | 1382.4(2)                                         | 694.89                                            | 449.2(4)                                                               |
| Z                         | 4                                   | 4                                                 | 2                                                 | 1                                                                      |
| T(K)                      | 100(2)                              | 100(2)                                            | 100(2)                                            | 100                                                                    |
| D (g/cm <sup>3</sup> )    | 2.706                               | 2.195                                             | 2.184                                             | 2.126                                                                  |
| R(Int)                    | 0.0254                              | 0.0473                                            | 0.0198                                            | 0.0423                                                                 |
| $\mu$ (mm <sup>-1</sup> ) | 17.453                              | 11.127                                            | 11.068                                            | 8.811                                                                  |
| F(000)                    | 656                                 | 856                                               | 428                                               | 274                                                                    |
| $\theta$ range            | 2.72-25.42                          | 2.40-28.35                                        | 2.58-25.37                                        | 2.53-25.23                                                             |
| Index ranges              | ±12, ±4, ±26                        | ±6, ±14, ±32                                      | ±16, ±7, ±12                                      | ±8, ±9, ±10                                                            |
| Reflections collected     | 8065                                | 16608                                             | 3449                                              | 4152                                                                   |
| Independent reflections   | 1402                                | 2769                                              | 1279                                              | 1529                                                                   |
| Observed reflections      | 1612                                | 3458                                              | 1279                                              | 1529                                                                   |
| Data/ restr./ param.      | 1612/0/109                          | 3458/0/190                                        | 1279/3/97                                         | 1529/1/128                                                             |
| Min/Max trans.            | 0.049, 0.175                        | 0.408, 0.573                                      | 0.276, 0.408                                      | 0.020, 0.071                                                           |
| R(>2 $\sigma$ )           | 0.0255                              | 0.0246                                            | 0.018                                             | 0.0495                                                                 |
| R <sub>w</sub>            | 0.065                               | 0.0472                                            | 0.0461                                            | 0.1298                                                                 |
| GOOF                      | 1.059                               | 1.016                                             | 1.087                                             | 1.094                                                                  |
